# Supplementary material for: Colloidal stable quantum dots modified by dual functional group polymers for inkjet printing
Source: Royal Society of Chemistry journal article supplement (doi:10.1039/c7tc00452d), 2017-01-01
Supplement: c7tc00452d1.pdf [file c7tc00452d1.pdf]

## Supporting Information

### Colloidal Stable Quantum Dots Modified by Dual Functional Group Polymer for Inkjet Printing

Ting Han<sup>a</sup>, Ye Yuan<sup>a</sup>, Xiao Liang<sup>a</sup>, Yang Zhang<sup>a</sup>, Chuanxi Xiong<sup>ab</sup> and Lijie Dong<sup>a\*</sup>

#### Supporting Information 1

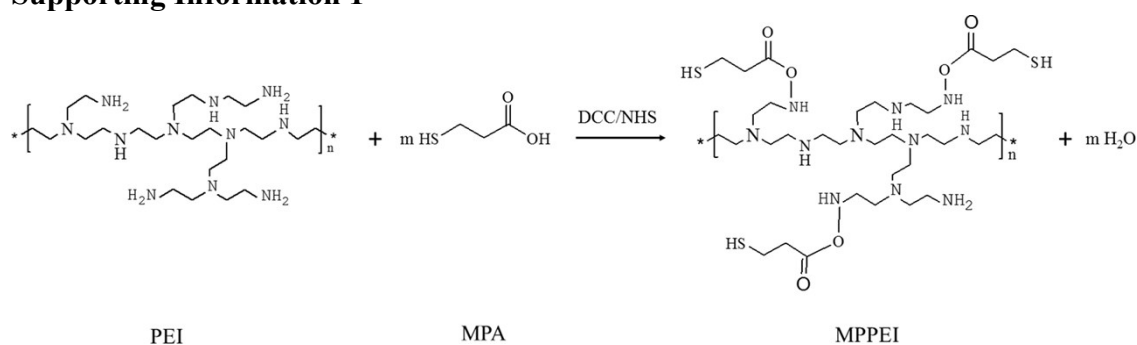

Fig. S1. Reaction equation between MPA and PEI.

#### Supporting Information 2

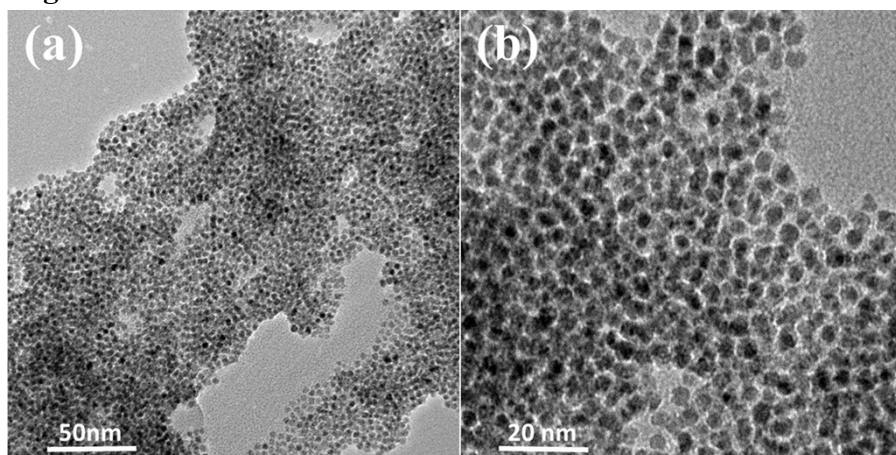

Fig. S2. TEM images of QDs/MPPEI in water with the concentration of 0.1 mg/ml. The scale bars in a and b are 50 and 20 nm, respectively.

#### Supporting Information 3

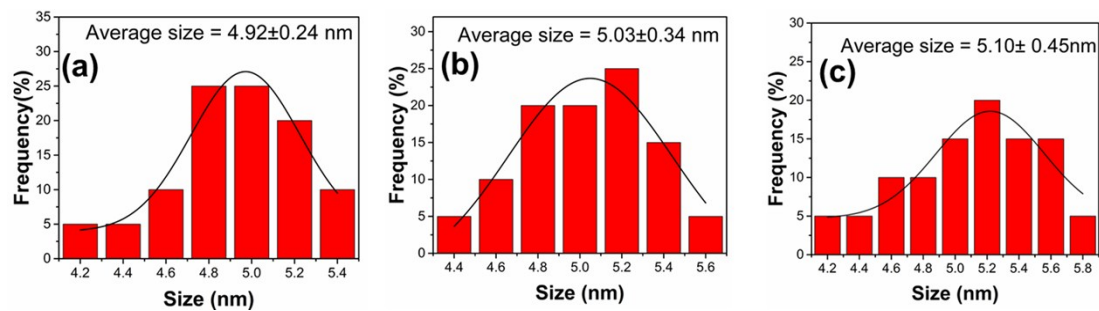

**Fig. S3.** (a) The size distributions of QDs dispersed in n-hexane, (b) and (c) QDs/MPPEI dispersed in distilled water with concentration of 0.05 mg/ml and 0.1 mg/ml.

#### Supporting Information 4

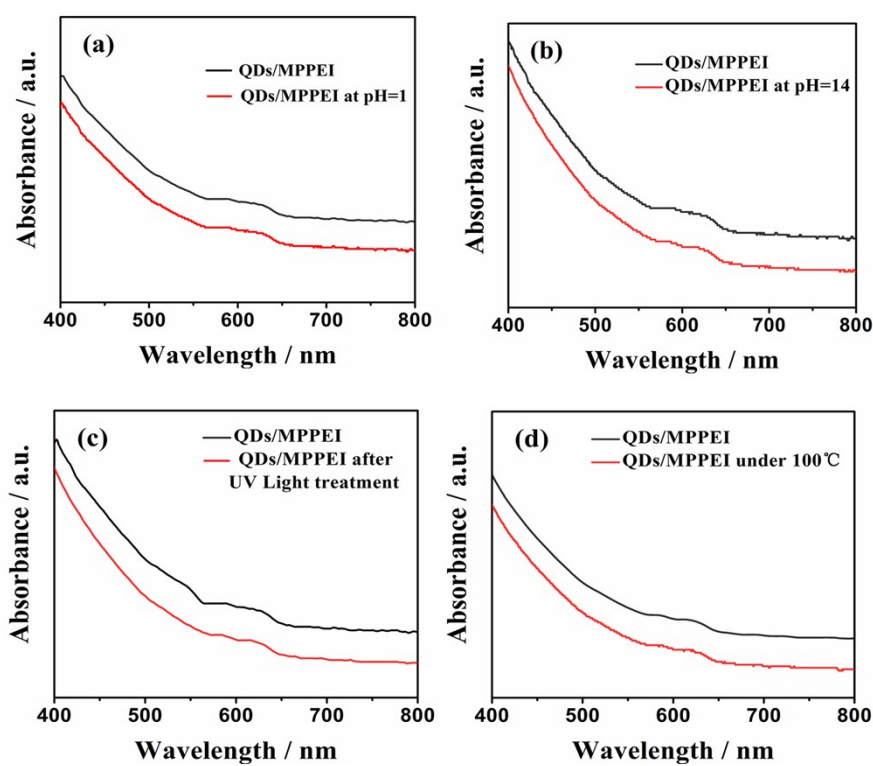

**Fig. S4.** UV-vis spectra of QDs/MPPEI before and after 100-min treatment by (a) strong acid, (b) strong base, (c) UV light and (d) high temperature.
